# Supplementary material for: Engineering Novel Lentiviral Vectors for Labelling Tumour Cells and Oncogenic Proteins
Source: MDPI journal article supplement (doi:10.3390/bioengineering9030091), 2022-02-25
Supplement: s1 [file s1]

# Engineering novel lentiviral vectors in labelling tumour cells and oncogenic proteins

Table S1. DNA sequences of primers used in amplification of vectors and inserts.

| Primer name | PCR product          | Sequence (5'-3')                                                                                                                                                 | Length | Tm (~) * | GC content |
|-------------|----------------------|------------------------------------------------------------------------------------------------------------------------------------------------------------------|--------|----------|------------|
| Forward-1   | Empty pLVX vector    | ACA AGG GCG GCA ACA GCG TG                                                                                                                                       | 20 bp  | 65°C     | 65%        |
| Reverse-1   | Empty pLVX vector    | TTT AAA CTC GAG GGT GGC GAC CGG TAG ATC CT                                                                                                                       | 32 bp  | 69°C     | 53%        |
| Forward-2   | E2-Crimson gene      | AAA TTT CTC GAG ATG GAT AGC ACT GAG AAC GTC                                                                                                                      | 33 bp  | 63°C     | 42%        |
| Reverse-2   | E2-Crimson gene      | TTT AAA GAA TTC CTA CTG GAA CAG GTG GTG GCG                                                                                                                      | 33 bp  | 65°C     | 46%        |
| Forward-3   | ZsYellow gene        | AAA TTT CTC GAG ATG GCT CAT TCA AAG CAC GGT                                                                                                                      | 33 bp  | 66°C     | 42%        |
| Reverse-3   | ZsYellow gene        | TTT AAA GAA TTC TCA GGC CAA GGC AGA AGG GAA                                                                                                                      | 33 bp  | 65°C     | 42%        |
| Forward-4   | HA-tagged EPHA3 gene | AAA TTT CTC GAG ATG GAT TGT CAG CTC TCC ATC CTC<br>CTC CTT CTC AGC TGC TCT GTT CTC GAC AGC TTC GGG<br>TAC CCA TAC GAT GTT CCA GAT TAC GCT GAA CTG ATT<br>CCG CAG | 114 bp | 95°C     | 50%        |
| Reverse-4   | HA-tagged EPHA3 gene | TTT AAA GAA TTC TTA CAC GGG AAC TGG GCC                                                                                                                          | 30 bp  | 63°C     | 43%        |

Extra space for restriction enzymes

XhoI restriction site (C▼TCGAG)

EcoRI restriction site (G▼AATTC)

START codon (ATG)

Signal peptide

HA-tag

\* Tm values were calculated by using ApE (A Plasmid Editor) software.

Table S2. DNA sequence of pLVX-AmCyan1-C1 lentiviral expression plasmid. Functional regions are highlighted with different colours. Note the binding sites of Forward-1 (Line-28) and Reverse-1 (Line-23) primers.

ttggaagggttaattcactccaaagaagacaagatacttgatctgtggatctaccacacacaaggctacttccctgattagcagaactacacaccagggtccagggtcagataccactgacct  
 ttggatgggtgtacaaagctagctaccagttgagccagataaggtagaagaggccaataaaggagagaacaccagctgttacaccctgtgagcctgcatgggatggatgacccggagagagaa  
 ggttagagtgagggtttgacagccgcttagcattcatcacgtggcccgagagctgcatccggagtacttcaagaactgctgatatcgagctgtctacaagggaacttccgctggggactttcca  
 gggaggcgtggcctgggaggactgggagtgccgagccctcagatctctgcatataagcagctgcttttctgctgactgggtctctctggttagaccagatctgagcctgggagctctctggct  
 aactagggaaccactgcttaagcctcaataaagcttgccttgagtcttcaagtagtgtgtgcccgtctgtgtgtgactctggttaactagagatccctcagacccttttagtcagtgtggaaatct  
 ctgagctgtggcgccgaacagggaacttgaagcgaagggaaaccagagagctctctcagcagagactcggctgtgtaagcgcgcacggcaagaggcgaggggcgggcgactggtga  
 gtacgccaataattttgactagcggaggctagaaggagagagatgggtgagagagcgtcagattaaagggggagaattagatcgcatgggaaaaaattcggttaaggccagggggaa  
 agaaaaataataaataaataatagatgtggcaagcagggagctagaacgattcgagttaatctggcctgttagaatacagaaggctgtagacaatactgggacagctacaaccatc  
 ccttcagacaggatcagaagaacttagatcattatataatcagtagcaaccctctattgtgtgcatcaaggatagagataaaagacaccaaggaagcttagacaagatagaggaaagagcaa  
 aacaaaagtaagaccaccgcacagcaagcgccggcgtgactctcagacctggaggagagatatagggacaattggagaagtgaattatataaataaagtagtaaaaaattgaacca  
 ttaggatgtagccccaaggcaagagaagagtggtgcagagagaaaaagagcagtggaataggagctttgttcttgggttcttgggagcagcaggaagcactatggcgagcgt  
 caatgacgctgacggtacagggcagacaattattgtctgtatagtcagcagcagacaatttctgagggtattgaggcgcaacagcatctgttgaactcagacttggggcatcaagca  
 gctccaggcaagaatcctggctgtggaaagatacctaaaggatcaacagctcctggggaatttgggtgtctctggaactcatttgaccactgctgtgcttggatgtagtggagtaataa  
 atctctggaacagatttgaatcacagacctggatggagtgaggagagaaataaataacagcttaatacactccttaattgaagaatcgaaaaccagcaagaaagaatgaacaa  
 gaattattggaattagataaattggcaagtttgtgaattggttaacatacaaaattggctgtggtatataaaattattcataatgatagtaggaggcttggtaggttaagaatagttttgctgta  
 cttctatagtgaaatagagttaggcaggatattcaccattatcgttccagaccaccccaaccccgaggggaccgacaggccgaaggaatagaagaagaaggtggagagagagacag  
 agacagatccattcgattagtgacggatctgcagcgtatcgctttaaagaaaagggggattggggggtacagtgcaggggaaagaatagtagacataatagcaacagacatacaaaat  
 aaagaattacaaaaacaattacaaaaattcaaaattttcggtttattacaggagcagcagagatccagtttatcgataagcttgggagttccgctgtacataacttacggtaaatggccgcctg  
 gctgacgcccacacaccccgccattgacgtcaataatgacgtatgttccatagtaacgcaatagggaacttccattgacgtcaatgggtggagtattacggtaaaactgccacttggcagt  
 acatcaagtgtatcatatgccagtagcggccttattgacgtcaatgacggtaaatggccgcctggcattatgccagtagatgacattatgggacttctacttggcagtacatctacgtattagt  
 catcgctattaccatgggtgatcggttttggcagtagatcaatggcggtgtagcggttactcacgggatttcaagctccacccattgacgtcaatgggagttgttttggcaccaaaatc  
 aacgggactttccaaatgtcgtgaactcggccctttagcgcgaatggcggttaggcgtgtacgggtgggaggtctatataagcagagctcgttttagtgaaccgtcagatcgctggagagc  
 ccatccacgctgttttgacctcatagaagacaccgactctactagaggatctacgggtgcgcccatggcctgtccaacaagttcatcggcagcagatgaagatgacctaccatgagcggc  
 tgcgtgaacggccacttaccgtgaaggcgaggcgagggcagcggaagcctcagagggaaccagacctccactcaaggtgacatggccaacggcgggcccttgccttctccttcagc

atctctgtccaccgtgttcatgtacggcaaccgctgttccaccgctacccaccagcatgccgactacttcaagcaggccttccccacggcatgtctacgagagaaccttccactacgaggacg  
gcggtgtggccaccgcccagctgggagatcagcctgaagggcaactgtctcagcacaagtcacacttccacggtgtaacttccccgcgcagggccccgtgatggccaagaagaccaccggc  
tgggacctctctcagaagatgacctgtgtcgacggcatcttgaagggcgacgtgaccttctctgatgtcagggcgcggaactacagatgccagttccacacctctacaagacca  
agaagccccgtgacctgcccccaaccacgtggtggagcaccgcatcgccagaaccgacctggacaagggcggaacagcgtgcagctgaccgagcagccgtggccacatcacctccgt  
gggtcccttctccgactcagatctcagctcaagcttgaattctcagctcgacgggtaccgccccgggacccggatctagataactgatcataatttaccgggtaggggaggcgctt  
tcccaaggcagctgtgagcatgcgttttagcagccccgtggcacttggcgctacacaagtggcctctggcctcgacacattccacatccaccgtaggcgccaaccggctcgttcttgggtg  
gccccctcgccaccttctactctccccctagtcaggaagtcccccccgccccgcagctcgctgtcagcagcgtgacaaatggaagtagcacgtctcactagtctgtcagatggacagca  
ccgtgagcaatggaagcgggtaggccttggggcagcggccaatagcagcttctctctcgttcttgggtcagaggctgggaaggggtgggtccggggcggggtcaggggggggt  
cagggggcgggggcgccccgaaggtctccggagggccccgcattctgcacgttcaaaagcgacgtctgcgcgtgttctctctctctcatctccgggcttctcagctgcagcccaagctt  
accatgaccgagtagaagcccaagggtgcctcgcaccccgacgacgtccccaggggcgtacgcacctcgcgcgcgttcgcgactaccccgccacgcgcacacacgtctgacccgac  
cgccacatcgagcgggtaccgagctgcaagaactcttctcagcgctggtgggtcgacatcggaaggtgtgggtcgcgacgacggcgccggtgggtgctggaccacgcgggaga  
gctgcaagcggggggcggtgttcgcgagatcgccccgcagtcggcgagttgagcgggtccccggtggcgcgacgcaacagatggaaggtccttggcgccgacccggccaaggagc  
ccgctgtgttctggccaccgtcggtctcgcggaccaccaggggcaagggtctggcgacgcgcgtctgtctccccggagtgaggcgccgagcgcgcgggggtgcccccttctgga  
gacctccgcgccccgcaacctccccctctacgagcgtcggttccacgtcaccgacgtcgaggtgccccgaagaccgacgacctgtgcatgaccgcaagccccggtgctgaaccggt  
ctggaacaatcaacctctggattacaaaattgtgaagattgactggtattcttaactatgttgccttttacgctatgttgatacgtgctttaatgcctttgtatcatgtattgttcccgatggctt  
tcaatttctctctgtataaatctgtgtgtctctttagaggagttgtggccggtgtcagggcaacgtggcggtgtgtcactgtgttgcagcgaacccccactggttggggcattgccacc  
acctgtcagctcttctccggacttctccttccccctccctattgcccagcggaactcatcgccgctgcttcccgtctgtgacaggggctcggtgttgggactgacaattccgtggtgtgtg  
tcgggggaagctgacgtcttctatgggtgtcgcctgtgttgcacctggattctgcgcgggacgtctctgtcactgctccctcggccctcaatccagcggaccttcttcccgcggtctgtcgcg  
gctctgcggccttctcgcgtcttgccttcgcctcagacgagtcggatctcccttggcgccctccccgcttgaattaattctgcagctcgagacctagaaaaacatggagcaatcacaagtag  
caatacagcagctaccaatgtgattgtgctgtgctagaagcacaagaggaggagggtgggttttccagtcacacctcaggtaccttgaagaccaatgacttacaaggcagctgtagatctta  
ggcactttttaaagaaaagaggggactggaagggctaattcactcccaacgaagacaagatatcttctgtgtggtatccacacacaaggctacttccctgattagcagaactacacaccag  
ggccaggggtcagatatccactgaccttggatgtgtctacaagctagtagcaggttagccagataaggtagaagaggccaataaaggagagaacaccagcttgttacacctgtgagcctgc  
atgggatggatgacccggagagagaagtgttagagtgagggtttgacagccgctagcatttcatcacgtggcccgagagctgcatccggagtagtctcaagaactgctgatatcgactgtcta  
caagggacttctcgtggggacttccagggagcggtggcctggcgggactggggagtggtcgagccctcagatctgcatataagcagctgcttttgcctgtactgggtctctgtgtagac  
cagatctgagctgggagctctctggtaactagggaaacctgtctaagcctaataaagcttgccttgagtgcttcaagtagtgtgtgcccgtctgtgtgtgactctggttaactagagatccct  
cagaccttttagtcagtggtgaaatctctagcagtagtattcatgtatcttattatcagtagttataaactgcaaagaaatgaatatcagagagtgagaggccttgacattgctagcgttttacc  
gtgcaccttagctagagcttggcgtaatcatggtcatagctgttctctgtgtgaaattgttatccgctcacaattccacacacatcagagccggaagcataaagtgtaaagcctgggggtgccta  
gagtgagctaaatcacaatttgcgttgcgtcactgccccgttccagtcgggaaacctgtcgtgacagctgcattaatgaatcgccaacgcgcggggagaggcggttgcgtattgggcgt  
cttccgttctcgtcactgactcgtcgtcgtcgttgcgtcggcgagcgggtatcagctcactcaaaagcggtaatacaggttatccacagaatcaggggataacgcaggaaagaacatg  
tgagcaaaaggccagcaaaaggccaggaacgttaaaaggccggttgcgtgctgttttccataggtccgccccctgacgagcatcaaaaaatcgacgctcaagtcagaggtggcgaaa  
ccccgacaggactataaagataaccagggttccccctggaagctccctcgtgcgtctcctgttccgacctgcccgttaccggatacgttccgcttctcccttcgggaagcgtggcgcttctcat  
agctcagctgttaggtatctcagttcgggttaggtcgttgcctcaagctgggtgtgtgcagaaacccccgttcagcccagcgtcgcttctccggttaactatcgttctgagtcacacccggt  
aagacacgacttatcgccactggcagcagccactggttaacaggattagcagagcaggtatgttagcggtgtacagagttctgaagtgtgtggcctaactacggctacactagaagaacagt  
atttggtatctgcgtcgtgtaagccagttaccttcggaaaaagagttggtagctcttgatccggcaaaacacccgctggttagcggtgtgtttttgttgaagcagcagattacgcgcaga  
aaaaaaggatctcaagaagatctttagcttcttccaggggtgtgacgtcagtggaacgaaactcaggttaagggaatttggatcatgagattacaaaaagatcttccactagatcctttaa  
taaaaaatgaagtttaaatcaatctaaagtatatatagtaaacttggctgacagttaaccaatgttaatcagtgaggcacctatctcagcgtatgtctatcttcttcatcatagttgctgactcccc  
gtcgtgtagataaactacgatacgggagggttaccatctggccccagtgctcaatgataccgcgagaccacgctcaccggctccagatttatcagaataaaccagccagccggaaggcg  
agcgcagaagtgtctcgaactttatccgctccatccagcttataattgttgcgggaagctagagtaagtagttcgccagttatagtttgcgaacgttgttgcattgtctacaggcatctgtg  
gtgtcacgctcgtctgttggatgtgcttcatcagctccggttccaacgatcaaggcgagttacatgatccccatgttgtgcaaaaaagcgggttagctcttccgtcctccgatcgtgtcagaagt  
aagttggccgagtgattatcactcatggttatggcagcactgcataattcttactgtcatgccatccgtaagatgcttttctgtactggtgagtagtactcaaccaagtcattctgagaatagtgtatgc  
ggcgaccgagttgtcttgcggcgctcaatacgggataataccgcgccacatagcagaactttaaagtgtcatcattggaaaacgttcttccggggcgaaaacttcaaggatcttaccgctgt  
tgagatccagttcgatgtaacccactcgtgacccaactgatcttcagcatcttcttaccagcgttcttgggtgagcaaaaacaggaaggcaaaatccgcaaaaagggaataaggcg  
acacggaagtgtgaatactcactcttcttcaatattatgaagcatttatcagggttattgtctcatgagcggatacatattgaatgtatttagaaaaataaacaatagggttccgcgcac  
atttccccgaaaagtgccactgacgtcgacggatcgggagatcaactgtttattgcagcttataatggttacaaataaagcaatagcatcacaatttcacaaataaagcattttttcactgcatc  
tagttgtgtgttgcacaaactcatcaatgtatcttatcatgtctggatcaactggataactcaagctaaccacaaatcatcccaactccccaccataccctattaccactgcaattacctgtgtgtcat  
ttactctaaacctgtgattcctctgaattatttcattttaagaaattgtattgttaaatagtactacaacttagtagt

| Functional DNA region                                            | Line number | Base number |
|------------------------------------------------------------------|-------------|-------------|
| 5' LTR                                                           | L1-L6       | 1-635       |
| PBS (primer binding site)                                        | L6          | 636-653     |
| Ψ (*\packaging signal)                                           | L7          | 685-822     |
| RRE (Rev-response element)                                       | L11-L13     | 1303-536    |
| cPTT/CTS (central polypurine tract/central termination sequence) | L17-L18     | 2028-2151   |

|                                                                                  |         |           |
|----------------------------------------------------------------------------------|---------|-----------|
| PCMV IE (human cytomegalovirus immediate early promoter)                         | L18-L23 | 2185-2787 |
| Reverse-1 primer binding site                                                    | L23     | 2787-2806 |
| AmCyan1 fluorescent protein gene                                                 | L23-L29 | 2807-3493 |
| Forward-1 primer binding site                                                    | L28     | 3426-3445 |
| MCS (Multiple cloning site)                                                      | L29     | 3507-3559 |
| EcoRI restriction site (3523-3528)                                               | L29     | 3523-3528 |
| BamHI restriction site                                                           | L29     | 3554-3559 |
| STOP codons                                                                      | L29     | 3568-3578 |
| P <sub>PGK</sub> (phosphoglycerate kinase promoter)                              | L29-L33 | 3583-4091 |
| Puro <sup>R</sup> (Puromycin resistance gene)                                    | L34-L38 | 4112-4711 |
| WPRE (woodchuck posttranscriptional regulatory element)                          | L39-L43 | 4725-5316 |
| 3' LTR                                                                           | L45-L50 | 5519-6155 |
| pUC origin of replication (complementary)                                        | L53-L59 | 6625-7298 |
| Amp <sup>R</sup> (Ampicillin resistance gene; $\beta$ -lactamase)(complementary) | L60-L68 | 7443-8439 |

**Table S3. DNA sequence of pE2-Crimson prokaryotic expression plasmid. Functional regions are highlighted with different colours. Note the binding sites of Forward-2 (Line-3) and Reverse-2 (Line-8) primers.**

agcgccaataacgcaaacgcctctccccgcgttgccgattcattaatgcagctggcacgacaggtttcccgactggaagcgggcagtgagcgcaacgcaattaatgtgagttagctcactcattaggcaccacagcgtttacactttatgcttcggcgtcgatgtgtgtggaattgtgagcggataacaatttcacacagggaacagcctgaccatgattacgccaaagcttgcatgctcaggtcgactctagaggatccccgggtaccggctgccaccatggatagcactgagaacgttcaagcccttcacgcttcaaggtgcacatggagggtccgtgaacggccacgagttcgagatcgagggcgtggcgagggaagccctacgagggcacccagaccgccaagctgcaagtacaaaggcgcccccgtcccttcgctgggacatcctgtccccagttctctacggctccaaggcgtacatcaagcaccgcgacatccccgactacacagcagctcttccccgagggttcaagtgaggcgctgatgaacttcgaggacggcggtgtgtgacgtgacccaggactcctccctgaggacggcaccctcatctacacgtgaagttcatcggtgaacttccctccgacggcccgtaalgagaagaagactctgggtgggagccctccactgagcgcaactacccccgcgacggcgtgtgaagggcgagaaccacatggcgctgaagctgaagggcgggccactacgtgtgtgagttcaagtcacatcatatggccaagaagcccgtaagctgccccggtaccactacgtggactacaagctgcacatcaccctccacaacgaggactacacgtgtgtggagcagtagcagcgcgccgaggcccgccaccactgttccagtagcgccgcgactctagaattccaactgagcgccgtcgtaccattaccaactgtgtgtgtcaaaaataataggcctactagtcggccgtacggcccttctcgtcgcgcttccgtgtgatgacgggtgaaacctgtacacatgcagctccgagacggtcacagcttctgtgaagcggtgcccggagcagacaagcccgtcaggcgcgctcagcgggtgttgccgggtgtcggggtgctggttaactatgcggcatcagagcagattgtactgagagtgaccatatcggtgtgaataccgcacagatgcgtgaaggagaaaataccgcacagcgccctaaaggcctcgtgatacgcctattttataggttaattgtcatgataataatggttcttagacgtcaggtggcacttttcggggaaatgtgcgcggaaccctattgtttattttctaatacattcaaatatgtatccgctcatgagacaataaccctgataaatgcttaataatattgaaaggaagagtatgagtattcaacatttccgtgtgccttattccctttttcgcgcattttgccttctgttttctcaccagaacgctgggtgaaagtaaaagatgctgaagatcagttgggtgcacgagtggttatactgaactggtatcaacagcggtgaagatccttgagagtttgcggcgaagaacgttttccaatgatgacacttttaaagttctgctatgtggcggttattatccgtattgacggggcaagagcaactcggtcggcgcatacactattctcagaatgacttggtgagtactcaccagtcacagaaaagcatcttacgtaggcatgacagtaagagaattatcagtgctgccataacatgagtgataacactcgggccaacttactctgacaacgatcgaggagcgaaggagctaaccgctttttgacaacatggggatcatgtaactcgcttgatcgttgggaaccggaagtgaatgaagccatacacaacgacgagcgtgacaccacgatgctgtagcaatggcaacaacgttgcgcaactattaactggcgaacttactctagcttccggcaacaattaatagactggatggaggcgataaagttgaggaccacttctgcgtcggccctccggctggtgtttatgtctgataaatctggagccgggtgagcgtgggtctcggttatcattgcagcactggggccagatggtaagccctccgtatcgtatctacacgacggggagtcaggcaactatggatgaacgaataagacagatcgctgagataggtgctcactgattaaagcatttggttaactgtcagaccaagttactcatatactattagattgatttaaaactcatttttaatttaaaagatctaggtgaagatccttttgataatctcatgacaaaatcccttaacgtgagtttctgttccactgagcgtcagaccgctagaaaagatcaaaagatcttcttgagatccttttttctgcgcgtaatctgctgcttgcgaacaaaaaaaccacgctaccagcggtgtgtgttgcggatcaagagctaccaactcttttccgaaggttaactggctcagcagagcgagataccaataactgttcttctagtgtagccgttagtgccaccacttcaagaactctgtgacccgctacatacctcgtcgtgtaactctgttaccagtggtgtcgtccagtggtgcgataagctgtgttaccgggttgactcaagacgatgttaccggataaggcgacgggtcggtgaacgggggggttcgtgcacacagcccagcttgagcgaacgactacaccgaactgagatacctacagcgtgagctatgagaaagcgccacgctccgaaggagaaaggcgacaggtatccggaagcgcgagggtcggaacaggagagcgacgagggagcttccagggggaacgcctggtatctttagtctgtcgggttgcacactctgacttgagcgtcgtattttgtgatgctcgtcagggggcgagcctatggaaaaacgccagcaacgcgcccttttaccggttctggccttttctgacatgttcttctcggttatccctgattctgtggataaccgtattaccgcttgagtgtgataccgctcgcgcgagccgaacgaccgagcgagcagtcagtgagcgaggaagcggaag

| Functional DNA region                                             | Line number | Base number |
|-------------------------------------------------------------------|-------------|-------------|
| P <sub>lac</sub> (lac promoter)                                   | L1-L2       | 95-178      |
| Ribosome binding site                                             | L2          | 206-209     |
| Start codon                                                       | L2          | 217-219     |
| 5' MCS (multiple cloning site)                                    | L2-L3       | 234-281     |
| Forward-2 primer binding site                                     | L3          | 289-309     |
| E2-Crimson fluorescent protein gene                               | L3-L8       | 289-966     |
| Reverse-2 primer binding site                                     | L8          | 946-966     |
| 3' MCS (multiple cloning site)                                    | L8-L9       | 966-1065    |
| Amp <sup>R</sup> (Ampicillin resistance gene; $\beta$ -lactamase) | L13-L19     | 1511-2371   |
| pUC origin of replication                                         | L21-L26     | 2519-3161   |

**Table S4. DNA sequence of pZsYellow prokaryotic expression plasmid. Functional regions are highlighted with different colours. Note the binding sites of Forward-3 (Line-3) and Reverse-3 (Line-8) primers.**

agcgccaatacgcacaaacgcctctccccgcgcttgccgattcattaatgcagctggcagcacaggtttcccgactggaagcgggcagtgagcgcaacgcaattaatgtgagttagctcact  
cattaggcagccaggtttacactttatgcttccggctcgtatgttgggaattgtgagcggataacaatttcacacagggaacagctatgacatgattacgccaaagcttgcatgcctgcaggt  
cgactctagaggatccccgggtaccggctgccaccatggctcattcaaagcacgggtctaaaagaagaatgacaatgaaataccacatggaaggggtgcgtcaacggacataaatttggatcac  
ggcggaaggtcattggatccgttcaaagggaaacagactattaatctgtgtgtgatcgaagggggaccattgccattttccgaagacatattgtcagctggcttaagtacggagacaggtttt  
cactgaatatcctcaagacatagtagactatttcaagaactcgtgtcctgctggatatacatggggcaggtctttctcttggagatggagcagctcgcataatgtagatataacagtgagtg  
tcaaagaaaactgcatttatcataagagcatatttaattggagtgaaatttctctgctgatggacctgtgatgaaaaagatgacaactaactgggaagcatcctgcgagaagatcatgccagtaccta  
agcaggggatactgaaaggggatgtctccatgtacctccttctgaaggtggtggcggttaccgggtgccagttcgacacagtttacaagcaaaagctgtgccaagtaagatgccggagtgga  
cttcatccagcataagctcctcgtgaagaccgcagcgtactaagaatcagaagtggcagctgacagagcatgctattgcaatccctctgccttggcctgaagcggccgcgactctagaattcc  
aactgagcgcgggtcgtaccattaccaacttgcctggtgtcaaaaaataataggcctactagtcggccgtacgggccccttctcgtcgcgctttcgggtgatcgggtgaaaacctctgacacatgc  
agctcccggagacgggtcacagcttgcgtgaagcggatgcggggagcagacaagcccgtcagggcgctcagcgggtgttggcgggtgtcggggctggcttaactatgcggcatcagagca  
gattgtactgagagtgacacatagcgggtgtgaaataccgcacagatgcgtaaggagaaaaataccgcacagcggccttaaggcctcgtgatccctattttataggttaattgtcatgataa  
taatggtttcttagacgtcaggtggcacttttccgggaaatgtgcgggaacccctatttcttatttttcaataacattcaaatatgtatccgctcatgacaataacctgataaattgctcaataat  
attgaaaaaggaagagtatgagtattcaacattccgtgtcgccttattcccttttttgcgcgattttgccttctgttttgcctaccagaacagctgggtgaaagtaaaagatgtgaagatcagttg  
ggtgcagagtggtggtatcatcgaactggatctcaacacgggtaagatccttgagagtttgcggcggaagacgtttccaatgatgacacttttaaagttctgctatgtggcgcggtattatccc  
tattgacggcggaagagcaactcggctcgcgcacatactattctcagaatgacttgggtgagtactcaccagtcacagaaaaagatcttacggatggcatgacagtaagagaattatgcagtg  
ctgcataacatgagtgataaactgcggcaacttactctgacaacgatcggaggaccgaaggagtaaccgctttttgcacaacatgggggatcatgtaactgccttgatcgttgggaac  
cggagctgaatgaagccataccaacacgacgagcgtgacaccagatgcctgtagcaatggcaacaacgttgcgcaactattaactggcgaactacttacttagcttcccgcgaacaattaata  
gactggatggaggcggataaagttgcaggaccacttctgcgtcggccttccggctggtgttattgtctgataaatctggagccggtgagcgtgggtctcgcggatcattgcagcactggg  
gccagatggtaagccctcccgtatcgtatctacacgacggggagtcaggcaactatggatgaacgaatagacagatcgcctgagataggtgcctcactgattaagcattggttaactgtcag  
accaagtttactcatatatacttttagattgatttaaaactcatttttaatttaaaaggatctaggtgaagatccttttgataatctcatgacaaaaatcccttaacgtgagtttcttccactgagcgtca  
gaccccgtagaaaagatcaaagatcttcttgagatccttttttctgcgcgtaattctgctgttgcgaacaaaaaaaccacgcctaccagcgggtgttgttgcggatcaagagctaccaactctt  
ttccgaaggttaactggcttcagcagagcgcagataccaataactgttctttagttagcgcgtatgttaggcccaccacttcaagaactctgtagaccgcctacatactcgtctgctaatcctgtta  
ccagtggctgctgccagtggcgataagtcgtgtcttaccgggttgactcaagacgatagttaccggataagcgcgagcgggtcgggtgaacgggggggttcgtgcacacagccagccttggga  
gcgaacgacctacaccaactgagatacctacagcgtgagctatgagaagcgccacgcttcccgaaggagaaaggcgagcggatccggttaagcggcaggggtcggaacaggagagc  
gcacgagggagcttccagggggaacgccttggtatctttagtctcgtcgggttccgacactctgacttgagcgtcgtatgttggatgctcgtcagggggcgagcctatggaaaaacgcc  
agcaacgcggccttttaccggttcttgcccttttctggtgcttttctcatatgttcttctcgttatccctgattctgtggataaccgtattaccgctttagtgagctgataccgctcgcgcgagc  
cgaacgaccgagcgcagcagtgagcaggaagcggaag

| Functional DNA region                                             | Line number | Base number |
|-------------------------------------------------------------------|-------------|-------------|
| Plac (lac promoter)                                               | L1-L2       | 95-178      |
| Ribosome binding site                                             | L2          | 206-209     |
| Start codon                                                       | L2          | 217-219     |
| 5' MCS (multiple cloning site)                                    | L2-L3       | 234-292     |
| Forward-3 primer binding site                                     | L3          | 289-309     |
| ZsYellow fluorescent protein gene                                 | L3-L8       | 289-984     |
| Reverse-3 primer binding site                                     | L8          | 964-984     |
| 3' MCS (multiple cloning site)                                    | L8-L9       | 986-1085    |
| Amp <sup>R</sup> (Ampicillin resistance gene; $\beta$ -lactamase) | L13-L19     | 1531-2391   |
| pUC origin of replication                                         | L21-L26     | 2539-3181   |

Table S5. DNA alignment of the theorised (Query) and engineered (Sbjct) sequences of pLVX-E2.Crimson-C1 plasmid. A forward primer (5' gtacggtgggaggtctatat 3') was used for the sequencing.

|       |      |                                                               |      |
|-------|------|---------------------------------------------------------------|------|
| Query | 2721 | CGTCAGATCGCCTGGAGACGCCATCCACGCTGTTTTGACCTCCATAGAAGACACCGACTC  | 2780 |
| Sbjct | 9    | CGTCAGATCGCCTGGAGACGCCATCCACGCTGTTTTGACCTCCATAGAAGACACCGACTC  | 68   |
| Query | 2781 | TACTAGAGGATCTACCGGTCGCCACCCTCGAGATGGATAGCACTGAGAACGTCATCAAGC  | 2840 |
| Sbjct | 69   | TACTAGAGGATCTACCGGTCGCCACCCTCGAGATGGATAGCACTGAGAACGTCATCAAGC  | 128  |
| Query | 2841 | CCTTCATGCGCTTCAAGGTGCACATGGAGGGCTCCGTGAACGGCCACGAGTTCGAGATCG  | 2900 |
| Sbjct | 129  | CCTTCATGCGCTTCAAGGTGCACATGGAGGGCTCCGTGAACGGCCACGAGTTCGAGATCG  | 188  |
| Query | 2901 | AGGGCGTGGGCGAGGGCAAGCCCTACGAGGGCACCAGACCGCCAAGCTGCAAGTGACCA   | 2960 |
| Sbjct | 189  | AGGGCGTGGGCGAGGGCAAGCCCTACGAGGGCACCAGACCGCCAAGCTGCAAGTGACCA   | 248  |
| Query | 2961 | AGGGCGGCCCCCTGCCCTTCGCCTGGGACATCCTGTCCCCCAGTTCTTCTACGGCTCCA   | 3020 |
| Sbjct | 249  | AGGGCGGCCCCCTGCCCTTCGCCTGGGACATCCTGTCCCCCAGTTCTTCTACGGCTCCA   | 308  |
| Query | 3021 | AGGCGTACATCAAGCACCCCGCCGACATCCCCGACTACCTCAAGCAGTCCTTCCCCGAGG  | 3080 |
| Sbjct | 309  | AGGCGTACATCAAGCACCCCGCCGACATCCCCGACTACCTCAAGCAGTCCTTCCCCGAGG  | 368  |
| Query | 3081 | GCTTCAAGTGGGAGCGCGTGATGAACCTTCGAGGACGGCGGCGTGGTGACCGTGACCCAGG | 3140 |
| Sbjct | 369  | GCTTCAAGTGGGAGCGCGTGATGAACCTTCGAGGACGGCGGCGTGGTGACCGTGACCCAGG | 428  |
| Query | 3141 | ACTCCTCCCTGCAGGACGGCACCCTCATCTACCACGTGAAGTTCATCGGCGTGAACTTCC  | 3200 |
| Sbjct | 429  | ACTCCTCCCTGCAGGACGGCACCCTCATCTACCACGTGAAGTTCATCGGCGTGAACTTCC  | 488  |
| Query | 3201 | CCTCCGACGGCCCCGTAATGCAGAAGAAGACTCTGGGCTGGGAGCCCTCCACTGAGCGCA  | 3260 |
| Sbjct | 489  | CCTCCGACGGCCCCGTAATGCAGAAGAAGACTCTGGGCTGGGAGCCCTCCACTGAGCGCA  | 548  |
| Query | 3261 | ACTACCCCCGCGACGGCGTGCTGAAGGGCGAGAACCACATGGCGCTGAAGCTGAAGGGCG  | 3320 |
| Sbjct | 549  | ACTACCCCCGCGACGGCGTGCTGAAGGGCGAGAACCACATGGCGCTGAAGCTGAAGGGCG  | 608  |
| Query | 3321 | GCGGCCACTACCTGTGTGAGTTCAAGTCCATCTACATGGCCAAGAAGCCCGTGAAGCTGC  | 3380 |
| Sbjct | 609  | GCGGCCACTACCTGTGTGAGTTCAAGTCCATCTACATGGCCAAGAAGCCCGTGAAGCTGC  | 668  |
| Query | 3381 | CCGGCTACCACTACGTGGACTACAAGCTCGACATCACCTCCCACAACGAGGACTACACCG  | 3440 |
| Sbjct | 669  | CCGGCTACCACTACGTGGACTACAAGCTCGACATCACCTCCCACAACGAGGACTACACCG  | 728  |
| Query | 3441 | TGGTGGAGCAGTACGAGCGCGCCGAGGCCCGCCACCACCTGTTCCAGTAGGAATTCTG-C  | 3499 |
| Sbjct | 729  | TGGTGGAGCAGTACGAGCGCGCCGAGGCCCGCCACCACCTGTTCCAGTAGGAATTCTGCC  | 788  |
| Query | 3500 | AGTCGACGGTACCGCGGGCCCGGATCCACCGGA-TCTAGATAACTGATCATAATTCTAC   | 3558 |
| Sbjct | 789  | AGTCGACGGTACCGCGGGCCCGGATCCACCGGATTCTAGATAACTGATCATAATT-TAG   | 847  |
| Query | 3559 | CGGGTAGGGGAGGCGCTTTTCCC-A-AGGCAGTCTGGAGCAT-GCGCTTTAGCAGCCCCG  | 3615 |
| Sbjct | 848  | CGGGAAGGGGAGGCGCTTTTCCCCAGAGGCAGTCTGGAGCGTTGTACTTACCCACCCCT   | 907  |
| Query | 3616 | CTGGGCACTTGGCG                                                | 3629 |
| Sbjct | 908  | CGGGGCACCTGGCG                                                | 921  |

| Functional DNA region                                        | Base number (on Query seq.) |
|--------------------------------------------------------------|-----------------------------|
| pLVX backbone (flanking 5' end of E2.Crimson gene)           | ← 2721-2806                 |
| XhoI restriction site                                        | 2807-2812                   |
| Start codon                                                  | 2813-2815                   |
| E2.Crimson fluorescent protein gene                          | 2813-3490                   |
| Stop codon                                                   | 3488-3490                   |
| EcoRI restriction site                                       | 3491-3496                   |
| pLVX backbone (flanking 3' end of E.2 Crimson gene)          | 3497-3629 →                 |
| Triple Stop codons (located in the backbone of pLVX plasmid) | 3536-3546                   |

Table S6. DNA alignment of the theorised (Query) and engineered (Sbjct) sequences of pLVX-E2.Crimson-C1 plasmid. A reverse primer (5' cagactgccttgggaaaa 3') was used for the sequencing.

|       |      |                                                               |      |
|-------|------|---------------------------------------------------------------|------|
| Query | 2944 | CAAGCTGCAAGTGACCAAGGGCGGCCCCCTGCCCTTCGCCTGGG-ACATCCTGTCCCCC   | 3002 |
| Sbjct | 613  | CAAGCTGCTAGTGACCAAGTGCGGCCCCCTGCCCTTCGCCTGGGTACATCCTGTCCCCC   | 554  |
| Query | 3003 | AGTTCTTCTACGGCTCCAAGGCGTACATCAAGCACCCCGCCGACATCCCCGACTACCTCA  | 3062 |
| Sbjct | 553  | AGTT-TTCTACGGCTCCAAGGCGTACATCAAGCACCCCGCCGACATCCCCGACTACCTCA  | 495  |
| Query | 3063 | AGCAGTCCTTCCCCGAGGGCTTCAAGTGGGAGCGCGTGATGAAC TTCGAGGACGGCGGCG | 3122 |
| Sbjct | 494  | AGCAGTCCTTCCCCGAGGGCTTCAAGTGGGAGCGCGTGATGAAC TTCGAGGACGGCGGCG | 435  |
| Query | 3123 | TGGTGACCGTGACCCAGGACTCCTCCCTGCAGGACGGCACCCCTCATCTACCACGTGAAGT | 3182 |
| Sbjct | 434  | TGGTGACCGTGACCCAGGACTCCTCCCTGCAGGACGGCACCCCTCATCTACCACGTGAAGT | 375  |
| Query | 3183 | TCATCGGCGTGAACTTCCCCTCCGACGGCCCCGTAATGCAGAAGAAGACTCTGGGCTGGG  | 3242 |
| Sbjct | 374  | TCATCGGCGTGAACTTCCCCTCCGACGGCCCCGTAATGCAGAAGAAGACTCTGGGCTGGG  | 315  |
| Query | 3243 | AGCCCTCCACTGAGCGCAACTACCCCGCGACGGCGTGCTGAAGGGCGAGAACCACATGG   | 3302 |
| Sbjct | 314  | AGCCCTCCACTGAGCGCAACTACCCCGCGACGGCGTGCTGAAGGGCGAGAACCACATGG   | 255  |
| Query | 3303 | CGCTGAAGCTGAAGGGCGGCGGCCACTACCTGTGTGAGTTCAAGTCCATCTACATGGCCA  | 3362 |
| Sbjct | 254  | CGCTGAAGCTGAAGGGCGGCGGCCACTACCTGTGTGAGTTCAAGTCCATCTACATGGCCA  | 195  |
| Query | 3363 | AGAAGCCCGTGAAGCTGCCCGGCTACCACTACGTGGACTACAAGCTCGACATCACCTCCC  | 3422 |
| Sbjct | 194  | AGAAGCCCGTGAAGCTGCCCGGCTACCACTACGTGGACTACAAGCTCGACATCACCTCCC  | 135  |
| Query | 3423 | ACAACGAGGACTACACCGTGGTGGAGCAGTACGAGCGCGCCGAGGCCCGCCACCACCTGT  | 3482 |
| Sbjct | 134  | ACAACGAGGACTACACCGTGGTGGAGCAGTACGAGCGCGCCGAGGCCCGCCACCACCTGT  | 75   |
| Query | 3483 | TCCAGTAGGAATTCTGCAGTCGACGGTACCGCGGGCCCGGGATCCACCGGATCTAGATAA  | 3542 |
| Sbjct | 74   | TCCAGTAGGAATTCTGCAGTCGACGGTACCGCGGGCCCGGGATCCACCGGATCTAGATAA  | 15   |
| Query | 3543 | CTGATCATA 3551                                                |      |
| Sbjct | 14   | CTGATCATA 6                                                   |      |

| Functional DNA region                                        | Base number (on Query seq.) |
|--------------------------------------------------------------|-----------------------------|
| E2.Crimson fluorescent protein gene (covering 132-678 bases) | ← 2944-3490                 |
| Stop codon                                                   | 3488-3490                   |
| EcoRI restriction site                                       | 3491-3496                   |
| pLVX backbone (flanking 3' end of E.2 Crimson gene)          | 3497-3551→                  |
| Triple Stop codons (located in the backbone of pLVX plasmid) | 3536-3546                   |

**Table S7. Primary glioblastoma cell lines that were successfully infected with lentiviral particles.** The protocol in Results Section 3.6 “Preparation and purification of lentiviral particles” was used to prepare the lentiviral particles.

|   | Cell line [1,2] | Reference no. |   | Cell line | Reference no. |    | Cell line | Reference no. |
|---|-----------------|---------------|---|-----------|---------------|----|-----------|---------------|
| 1 | BAH1            | QIMR-B001     | 5 | MMK1      | QIMR-B001     | 9  | RN1       | QIMR-B001     |
| 2 | FPW1            | QIMR-B001     | 6 | MN1       | QIMR-B001     | 10 | SB2b      | QIMR-B001     |
| 3 | HW1             | QIMR-B001     | 7 | PB1       | QIMR-B001     | 11 | SJH1      | QIMR-B001     |
| 4 | JK2             | QIMR-B001     | 8 | RK11      | QIMR-B001     | 12 | WK1       | QIMR-B001     |

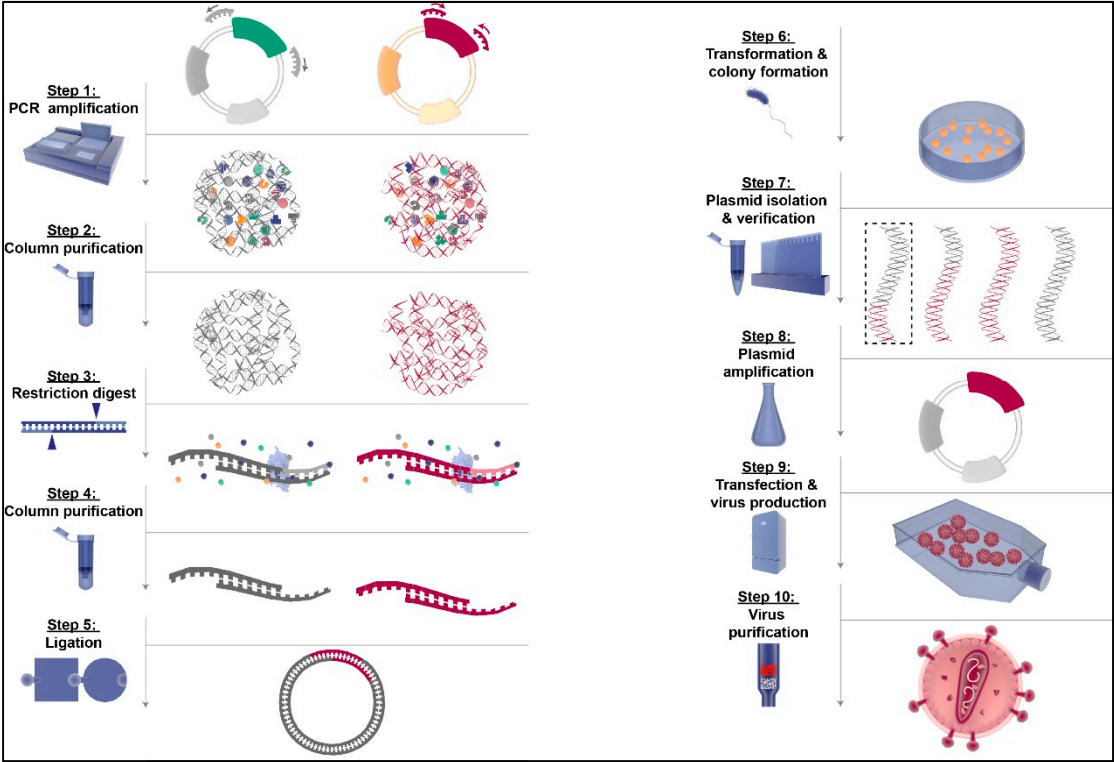

**Figure S1.** Outline of High-Fidelity Amplification-Restriction-Ligation strategy.

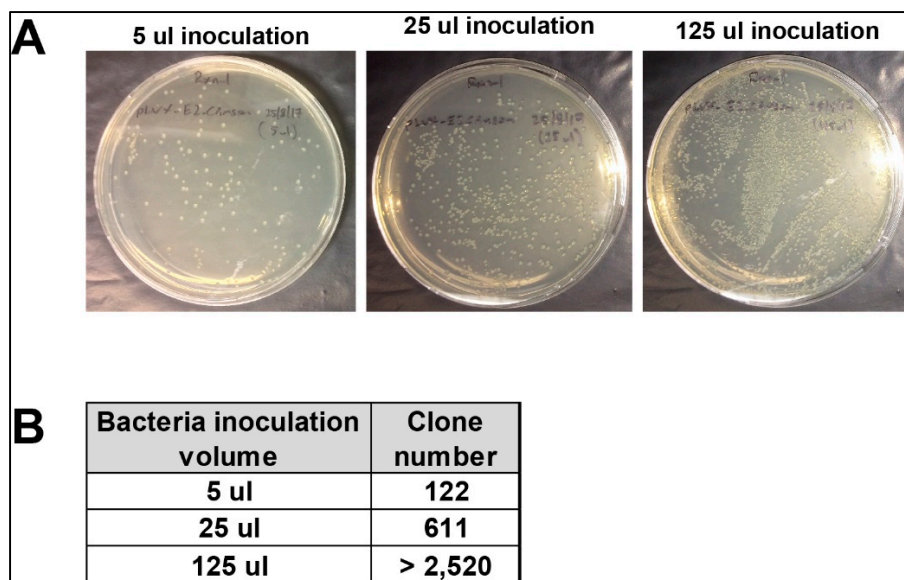

**Figure S2.** Heat shock technique is used to transform the competent bacteria with newly engineered pLVX-E2-Crimson-C1 lentiviral constructs. A, Efficiency of bacterial colony formation is assessed by inoculating different volumes of heat-shocked bacteria. B, Quantification of bacteria clones in A after 16 hours of incubation at 37°C.

## References

1. Stringer, B.W.; Day, B.W.; D'Souza, R.C.J.; Jamieson, P.R.; Ensbey, K.S.; Bruce, Z.C.; Lim, Y.C.; Goasdoue, K.; Offenhauser, C.; Akgul, S.; et al. A reference collection of patient-derived cell line and xenograft models of proneural, classical and mesenchymal glioblastoma. *Sci Rep* **2019**, *9*, 4902, doi:10.1038/s41598-019-41277-z.
2. QIMR, B.M.R.I. QCell. Available online: <https://www.qimrberghofer.edu.au/commercial-collaborations/partner-with-us/qcell/> (accessed on 14/02/2022).
